# Supplementary material
Source: publisher site journal article supplement (https://www.spandidos-publications.com/6782/downloadSupplementary)
Supplement: Supplementary file 1 [file downloadSupplementary]

## Sheet: Sheet1
Table SII. Potential targets of stigmasterol involved in the treatment of GBM.
Gene name	Gene symbol
Adenosine A3 receptor	ADORA3
Alpha-1B adrenergic receptor	ADRA1B
Beta-1 adrenergic receptor	ADRB1
Androgen Receptor	AR
Butyrylcholinesterase	BCHE
Cyclin-dependent kinase 4	CDK4
Cyclin-dependent kinase 6	CDK6
Muscarinic acetylcholine receptor M1	CHRM1
Muscarinic acetylcholine receptor M2	CHRM2
Muscarinic acetylcholine receptor M3	CHRM3
Cytochrome P450 19A1	CYP19A1
Cytochrome P450 2C19	CYP2C19
Fatty acid binding protein 3	FABP3
Fatty acid binding protein 5	FABP5
Gamma-aminobutyric acid receptor subunit alpha-1	GABRA1
Gamma-aminobutyric acid receptor subunit alpha-3	GABRA3
Gonadotropin-releasing hormone receptor	GNRHR
Orexin receptor 1	HCRTR1
Orexin receptor 2	HCRTR2
5-hydroxytryptamine receptor 2A	HTR2A
Indoleamine 2,3-dioxygenase	IDO1
Niemann-Pick C1-like protein 1	NPC1L1
Progesterone receptor	PGR
Urokinase-type plasminogen activator	PLAU
Prostanoid EP3 receptor	PTGER3
Prostaglandin G/H synthase 1	PTGS1
Sphingosine 1-phosphate receptor Edg-3	S1PR3
Sodium channel protein type 5 subunit alpha	SCN5A
Smoothened homolog	SMO
Telomerase reverse transcriptase	TERT
DNA topoisomerase II alpha	TOP2A
